# Supplementary material for: The PRDM14–CtBP1/2–PRC2 complex regulates transcriptional repression during the transition from primed to naïve pluripotency
Source: Oxford University Press journal article supplement (doi:10.1242/jcs.240176), 2020-07-13
Supplement: jcs240176supp.pdf [file jcs240176supp.pdf]

## Supplementary Figure 1

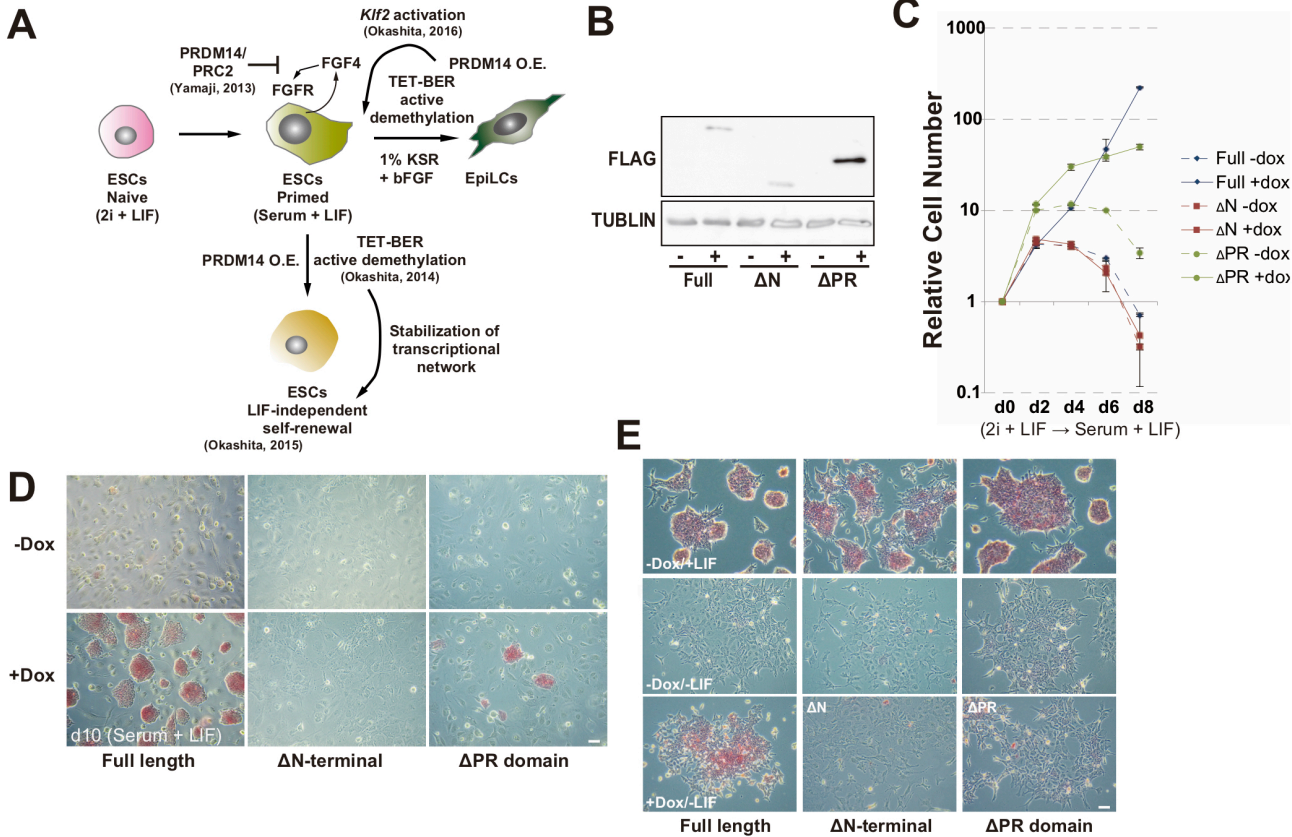

**Supplementary Figure 1.** (A) The scheme of the PRDM14 function in the maintenance and induction of pluripotency. (B) The establishment of *Prdm14*-inducible ESCs lacking endogenous *Prdm14*. (C) The proliferation rate of *Prdm14*-deficient ESCs with or without exogenous *Prdm14* in serum plus LIF condition. Error bars indicate  $\pm$  standard errors of the mean (SEM) of biological triplicates. (D) Alkaline phosphatase staining of *Prdm14*-deficient ESCs with or without exogenous *Prdm14* ten days after the transfer to serum plus LIF condition. (E) Alkaline phosphatase staining of ESCs with or without exogenous *Prdm14* expression in serum plus LIF or serum minus LIF. Scale bar : 50  $\mu$ m

## Supplementary Figure 2

**A**

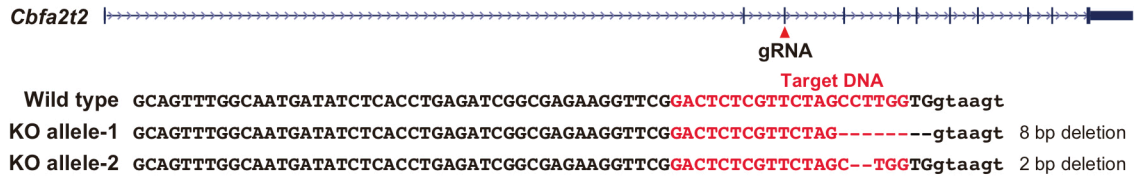

**B**

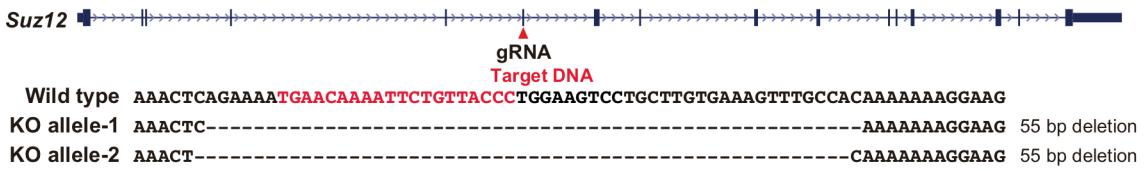

**C**

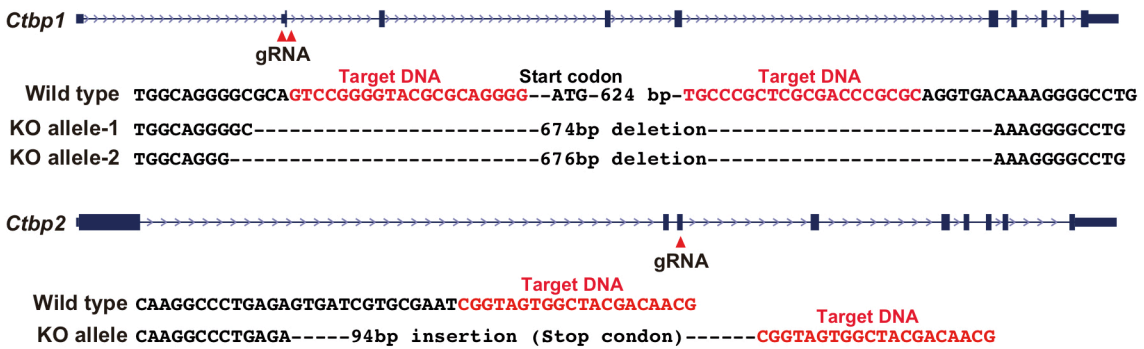

**Supplementary Figure 2.** The deletion sequence of *Cbfa2t2*, *Suz12* and *Ctbp1/2* locus by CRISPR/Cas9 system.

**Table S1. Oligonucleotide lists for guide RNAs, qRT-PCR, Hpa II -qPCR and ChIP-qPC Guide RNA**

| Gene                    | Strand  | Sequence(5'-3')            |
|-------------------------|---------|----------------------------|
| <i>Ctbp1</i> upstream   | Forward | CACCGTCCGGGGTACGCGCAGGGG   |
|                         | Reverse | AAACCCCCTGCGCGTACCCCGGAC   |
| <i>Ctbp1</i> downstream | Forward | CACCGTGCCCGCTCGCGACCCGCGC  |
|                         | Reverse | AAACGCGCGGGTTCGCGAGCGGGCAC |
| <i>Ctbp2</i>            | Forward | CACCGATCCGCCCCAGCTGATGAA   |
|                         | Reverse | AAACTTCATCAGCTGGGGGCGGATC  |
| <i>Cbfa2t2</i>          | Forward | CACCGACTCTCGTTCTAGCCTTGG   |
|                         | Reverse | AAACCCAAGGCTAGAACGAGAGTC   |
| <i>Suz12</i>            | Forward | CACCGTGAACAAAATTCTGTTACCC  |
|                         | Reverse | AAACGGGTAACAGAATTTTGTTCAC  |

ChIP-qPCR

| Gene                    | Strand  | Sequence(5'-3')        |
|-------------------------|---------|------------------------|
| <i>Dnmt3b</i> (-7.5 kb) | Forward | GGGGGAATTACTTTGCCGGAG  |
|                         | Reverse | TGCAATTCTCTATGGGGTTCG  |
| <i>Dnmt3b</i> (-6.2 kb) | Forward | TCTTACCTCGGCTGGGAGAA   |
|                         | Reverse | ACGAAGCTGAGAAGTTAGACCT |
| <i>Zfp281</i>           | Forward | CATAGCCTGATGGAACCATTG  |
|                         | Reverse | ATGTACGTTCTGCCCGTGAG   |
| <i>Id1</i>              | Forward | TGCAGATGGACCTGCTAAGTG  |
|                         | Reverse | TCTCACACACAAACCCCTGTC  |
| <i>Tcl1</i>             | Forward | GCCCTGAGTGCAAACCTTACAG |
|                         | Reverse | CTATGTGGTGTGGGAAAGC    |
| <i>Dppa3</i>            | Forward | CCTCGTGTGAGAATTTGCATC  |
|                         | Reverse | GCCACGGCTATTCTATTCAAGT |
| <i>Tfap2c</i>           | Forward | TCTAAAAAGCCCCTTGTGGAG  |
|                         | Reverse | GACAGAGCCTCCAGAGAAAG   |

qRT-PCR

| Gene                | Strand  | Sequence(5'-3')          |
|---------------------|---------|--------------------------|
| <i>Prdm14</i> CDS   | Forward | TGTGGTACGGAAATGGCTATG    |
|                     | Reverse | AAACACCTTTCCACAGCGTTC    |
| <i>Prdm14</i> 3'UTR | Forward | GGAATCCATTTCAGACCAGGAG   |
|                     | Reverse | GCACATAGTCGCTGGCTACAG    |
| <i>Dnmt3b</i>       | Forward | CTCGCAAGGTGTGGGCTTTTGTAA |
|                     | Reverse | CTGGGCATCTGTCATCTTTCACC  |
| <i>Dnmt3l</i>       | Forward | CCAGGGCAGATTTCTTCTAAGGTC |
|                     | Reverse | TGAGCTGCACAGAGGCATCC     |
| <i>Gja1</i>         | Forward | GTGCAAGTGTGTAAGCGTGTG    |
|                     | Reverse | CACAAAGATCCATGAGGAAG     |

|               |         |                          |
|---------------|---------|--------------------------|
| <i>Tfap2c</i> | Forward | ACGCGGAAGAGTATGTTGTTG    |
|               | Reverse | TTGTATGTTCCGGCTCCAAGAC   |
| <i>Dppa3</i>  | Forward | AGGCTCGAAGGAAATGAGTTTG   |
|               | Reverse | TCCTAATTCTTCCCGATTTTCG   |
| <i>Sox15</i>  | Forward | TCCCCTTACCTATCCCCAGAC    |
|               | Reverse | AGTGTGCATTCTGGTTCCTTG    |
| <i>Mok</i>    | Forward | GGAGAAGACACCCATTATCAGAGA |
|               | Reverse | GATATTCTCCGGCTTCACGTC    |
| <i>Rbbp7</i>  | Forward | GGGACCTGCGTAATCTGAAACT   |
|               | Reverse | GGCGATCAGTACCACTTGAGG    |
| <i>Lefty2</i> | Forward | CAAAACACCCGGGACTCTTAGG   |
|               | Reverse | TAAATGACATGGGCAAAGCTG    |
| <i>Meis2</i>  | Forward | AAGGCGCTTGCTCCTATCTC     |
|               | Reverse | TGGTTGTCAAAACACCATTCC    |
| <i>Zic2</i>   | Forward | AACTTCCCTAGCCCACTTTCC    |
|               | Reverse | TCCGGGAGTTTACAAATGGAC    |
| <i>Zic5</i>   | Forward | CTGAAGTCATGCGGACGATAC    |
|               | Reverse | CTAATTAGACCCGGTGGCAAG    |
| <i>Uhrf1</i>  | Forward | GCCACTTCTTCACTCCTCACC    |
|               | Reverse | CACATCTCAGCCTTCCATGAC    |
| <i>Rhox6</i>  | Forward | TTTCCAAGAGACTCGTACCC     |
|               | Reverse | GTTTCGAGAACATCAGCACTC    |
| <i>Nanos3</i> | Forward | AATCCTCTGCAGCTCCTGAAC    |
|               | Reverse | CACACATAATCCCGCAAATG     |
| <i>Chd9</i>   | Forward | TAGATTGATTGGGGGAAGGTG    |
|               | Reverse | AAGTGGGACTGCATTGACTTG    |
| <i>Uhrf1</i>  | Forward | GCCACTTCTTCACTCCTCACC    |
|               | Reverse | CACATCTCAGCCTTCCATGAC    |
| <i>Id1</i>    | Forward | CAACAGAGCCTCACCTCTC      |
|               | Reverse | AGAAATCCGAGAAGCACGAA     |
| <i>Pou5f1</i> | Forward | CTCTCCCATGCATTCAAAGCTG   |
|               | Reverse | CCCCTGTTGTGCTTTTAATCC    |
| <i>Sox2</i>   | Forward | CTTGCTGGGTTTTGATTCTGC    |
|               | Reverse | AAGACCACGAAAACGGTCTTG    |
| <i>Klf2</i>   | Forward | CCCAGGAAAGAAGACAGGAG     |
|               | Reverse | AGGCATTTCTCACAAGGCATC    |
| <i>Tcl1</i>   | Forward | GAACTTGCCTTCTTCTCAGC     |
|               | Reverse | TCACAGGTCAGGTGGGTACAG    |
| <i>Nanog</i>  | Forward | AGCCAGGTTCTTCTTCTTC      |
|               | Reverse | AAGATCTGACGCCCTTCTTG     |
| <i>Esrrb</i>  | Forward | CGTGTGACAAGGAGACAGGAG    |
|               | Reverse | TCCAGCCACAACGTCATTATC    |
| <i>Nr0b1</i>  | Forward | GAAAGCGGTCGTAGCTGTAGG    |

|               |         |                       |
|---------------|---------|-----------------------|
|               | Reverse | GAAGCCAGTATGGAGCAGAGG |
| <i>Otx2</i>   | Forward | GAGGTGATCCGGTGTTTTAGC |
|               | Reverse | AATCAGTCGCACAATCCACAC |
| <i>Fgf5</i>   | Forward | ATGAGTGCATCTGCTCTGCTC |
|               | Reverse | CGTCTGTGGTTTCTGTTGAGG |
| <i>Pou3f1</i> | Forward | ATTTATTCGTGGAGCCTCTCG |
|               | Reverse | TATACACAGATGCGGCTCTCG |
| <i>Chd7</i>   | Forward | CGAGGAGAACCTGGACAAGAC |
|               | Reverse | CTTTCAGTGGAAGTCTGCTG  |
